# Supplementary material for: Differential Dose- and Tissue-Dependent Effects of foxo on Aging, Metabolic and Proteostatic Pathways
Source: MDPI journal article supplement (doi:10.3390/cells10123577), 2021-12-18
Supplement: s1 [file s1]

# Differential dose- and tissue-dependent effects of foxo on aging, metabolic and proteostatic pathways

Maria S. Manola, Sentiljana Gumeni and Ioannis P. Trougakos\*

Department of Cell Biology and Biophysics, Faculty of Biology, National and Kapodistrian University of Athens, Panepistimiopolis, 15784, Athens, Greece; mmanola@biol.uoa.gr (M.S.M.), sgumeni@biol.uoa.gr (S.G.)

\* **Correspondence:** itrougakos@biol.uoa.gr (I.P.T.), Tel: +30-210-7274555

## SUPPLEMENTARY INFORMATION

## Supplementary Figures

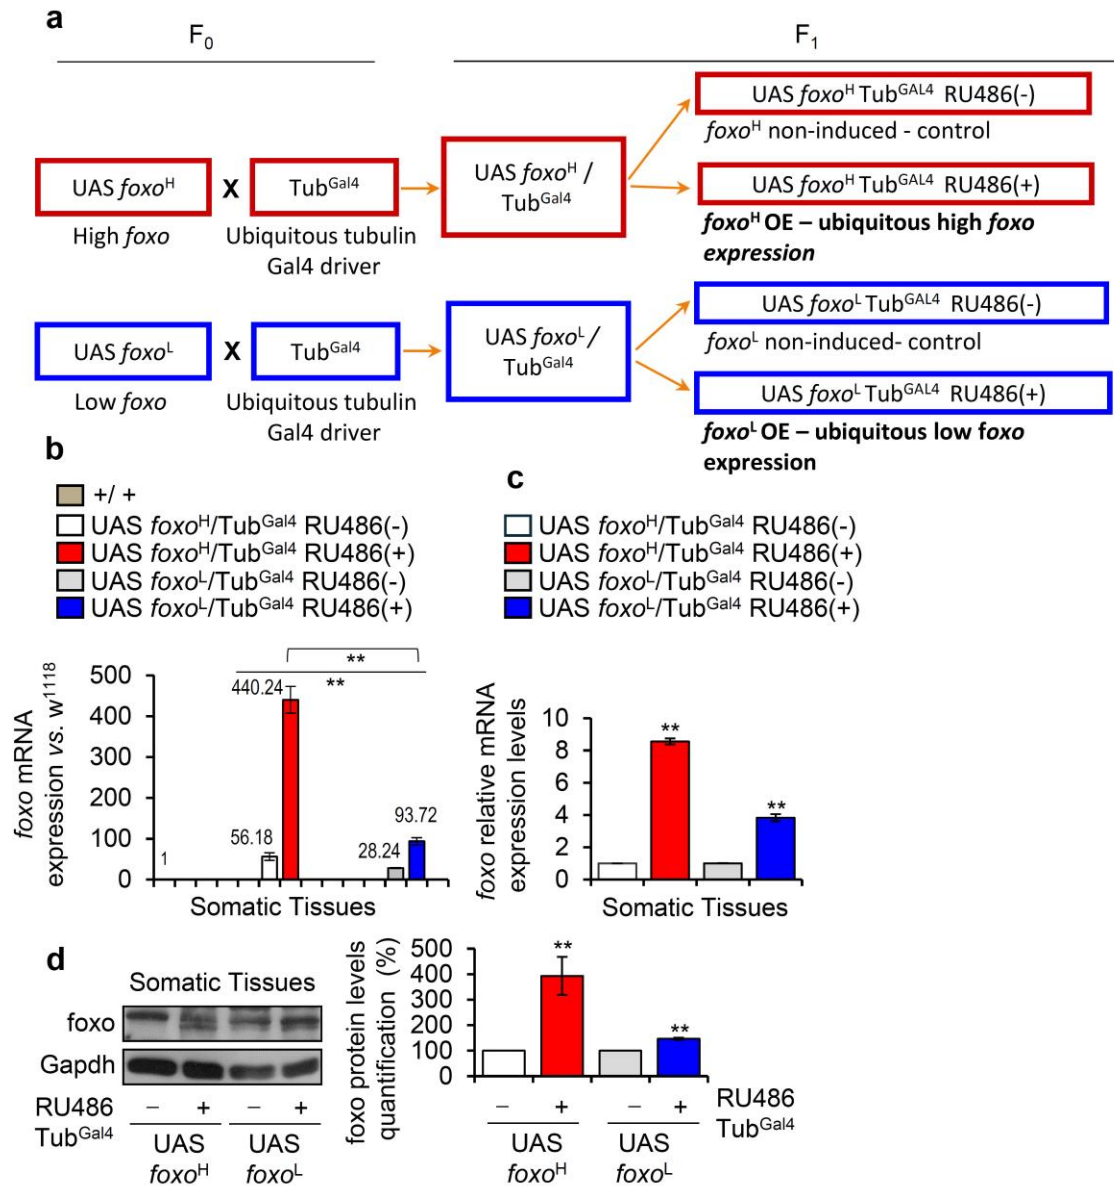

**Figure S1.** Molecular characterization of *Drosophila* transgenic lines overexpressing *foxo*. **(a)** Schematic illustration of our crossbreeding design to achieve ubiquitous *foxo*<sup>H</sup> or *foxo*<sup>L</sup> OE in somatic tissues of *Drosophila melanogaster* flies. Transgenic flies were cultured with 320  $\mu$ M RU486 [RU486(+)] to induce transgene(s) expression; untreated flies [RU486(-)] were used as controls. **(b, c)** Relative *foxo* mRNA expression levels in *foxo* overexpressing flies' somatic tissues 7 days post-transgene induction vs. the w<sup>1118</sup> (wild type) line **(b)** or transgenic not induced flies **(c)**. *RpL32* gene expression levels were used as input reference; gene expression was plotted vs. the respective control set to 1. **(d)** Immunoblotting analysis of *foxo* protein expression levels (left panel) and quantification (%) (right panel) in transgenic flies' somatic tissues 7 days post transgene induction. Control values were set to 100%. Gapdh probing was used as a loading control. Bars,  $\pm$  SD;  $n \geq 2$ , 20 flies were analyzed per experimental repeat. Statistical significance was measured with unpaired *t*-test, \*\*  $p < 0.01$ .

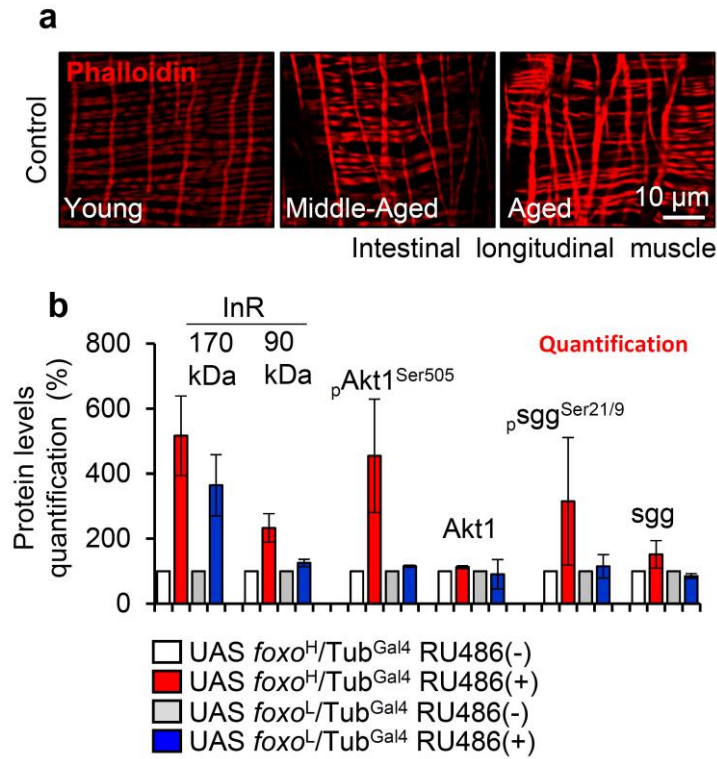

**Figure S2.** Longitudinal muscle fibers integrity during aging and quantification of IIS modules' protein levels expression. **(a)** Representative CLSM images of intestinal longitudinal muscle fibers' actin filaments (Phalloidin staining) of female young, middle-aged, and aged *w*<sup>1118</sup> wild type (control) flies,  $n \geq 3$ ; 10 female flies were analyzed per each experimental repeat. **(b)** Relative (% *vs.* controls) quantification of indicated proteins levels at immunoblots shown at Figure 2d. Control values were set to 100% and Gapdh was used as a loading control. Bars,  $\pm$  SD;  $n \geq 2$ . In **(b)**, statistical significance was measured with unpaired *t*-test.

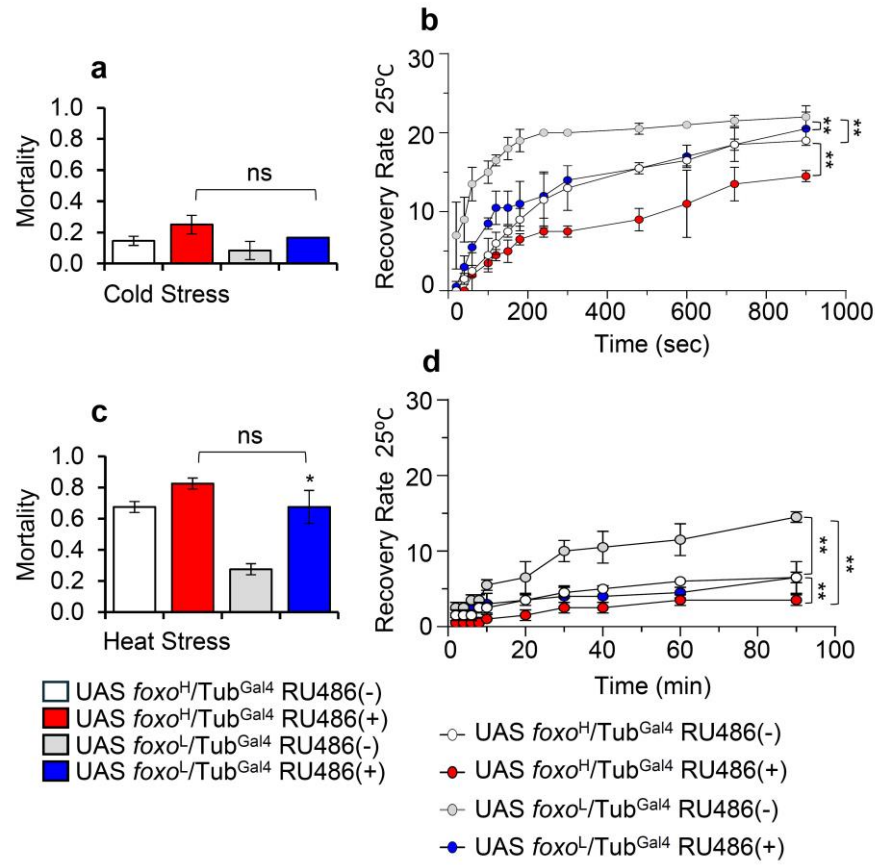

**Figure S3.** Ubiquitous *foxo* OE delays flies' recovery following thermal stress. (a) Mortality and, (b) recovery rates of shown *foxo* transgenic flies following cold sensitivity assay (see, Materials and Methods). (c) Mortality and (d) recovery rates of *foxo* overexpressing flies following transient exposure to heat stress (see, Materials and Methods). Bars,  $\pm$  SD;  $n = 2$ , 20 flies were analyzed per experimental repeat. In (a, c) statistical significance was calculated using the unpaired *t*-test; ns, non-significant. In (a, c), statistical significance was measured with unpaired *t*-test, ns, non-significant. In (b, d) a two-way ANOVA test followed by Tukey's multiple comparisons test was performed to determine statistical significance, \*\*  $p < 0.01$ .

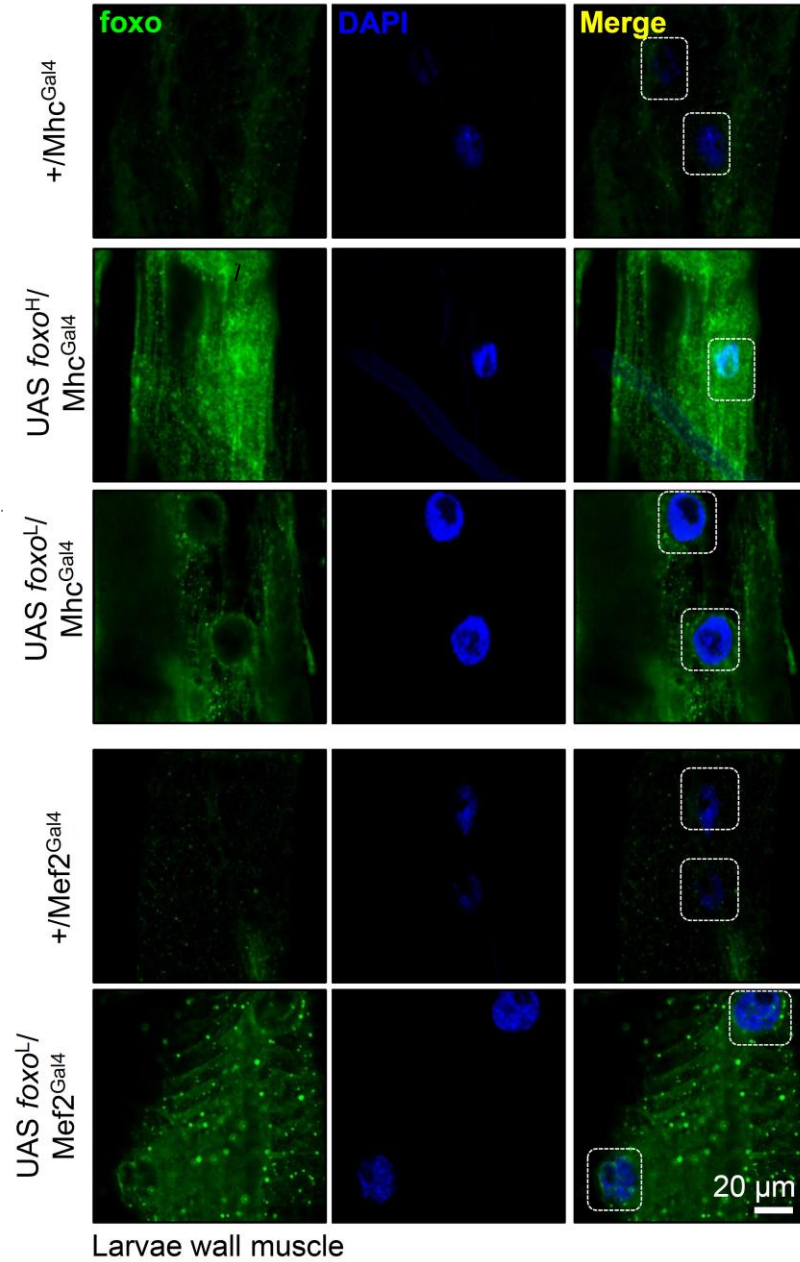

**Figure S4.** CLSM images of *foxo* cytoplasmic accumulation and translocation to the nucleus after muscle-specific *foxo* induction. Representative CLSM images of third instar larvae body wall muscle fibers after targeted *foxo* OE in muscles (using moderate *Mhc<sup>Gal4</sup>* or strong *Mef2<sup>Gal4</sup>* drivers); samples were stained with an anti-FOXO antibody and counterstained with DAPI.  $n \geq 3$ , 10 flies were analyzed per experimental repeat.

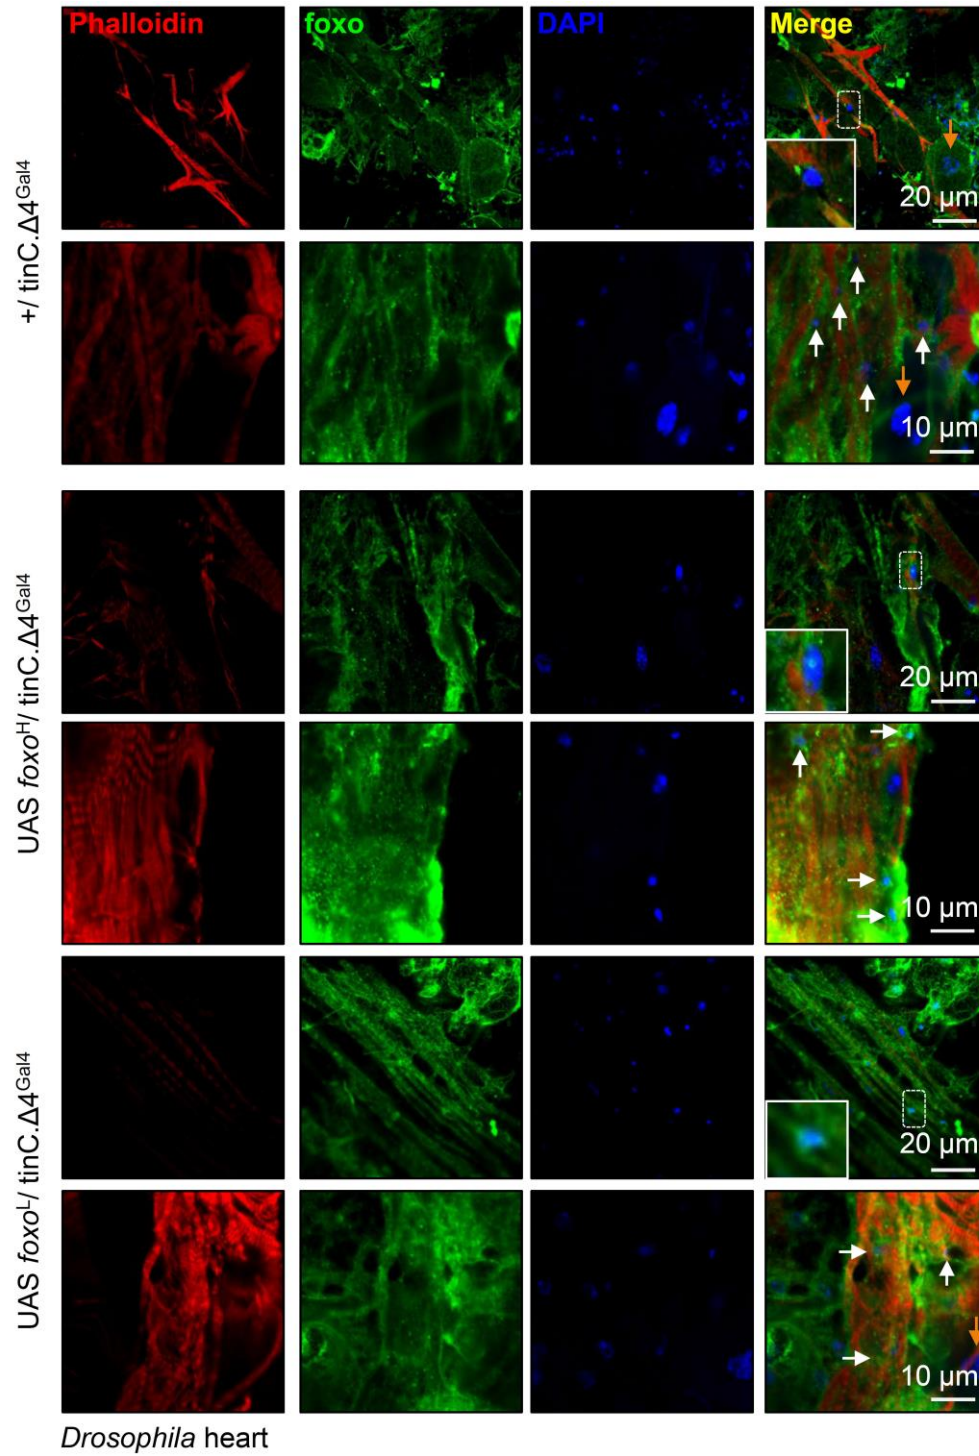

**Figure S5.** CLSM images of *foxo* cytoplasmic accumulation and translocation to the nucleus after cardiomyocyte-specific *foxo* induction. Representative CLSM images of intact young *Drosophila* hearts following *foxo*<sup>H</sup> or *foxo*<sup>L</sup> cardiomyocyte-specific (tinC.Δ4Gal4) OE; samples were stained with an anti-FOXO antibody and counterstained with DAPI to visualize nuclei. White arrows show cardiomyocytes' nuclei and orange arrows show pericardial cells' nuclei. n ≥ 3, 10 flies were analyzed per experimental repeat.



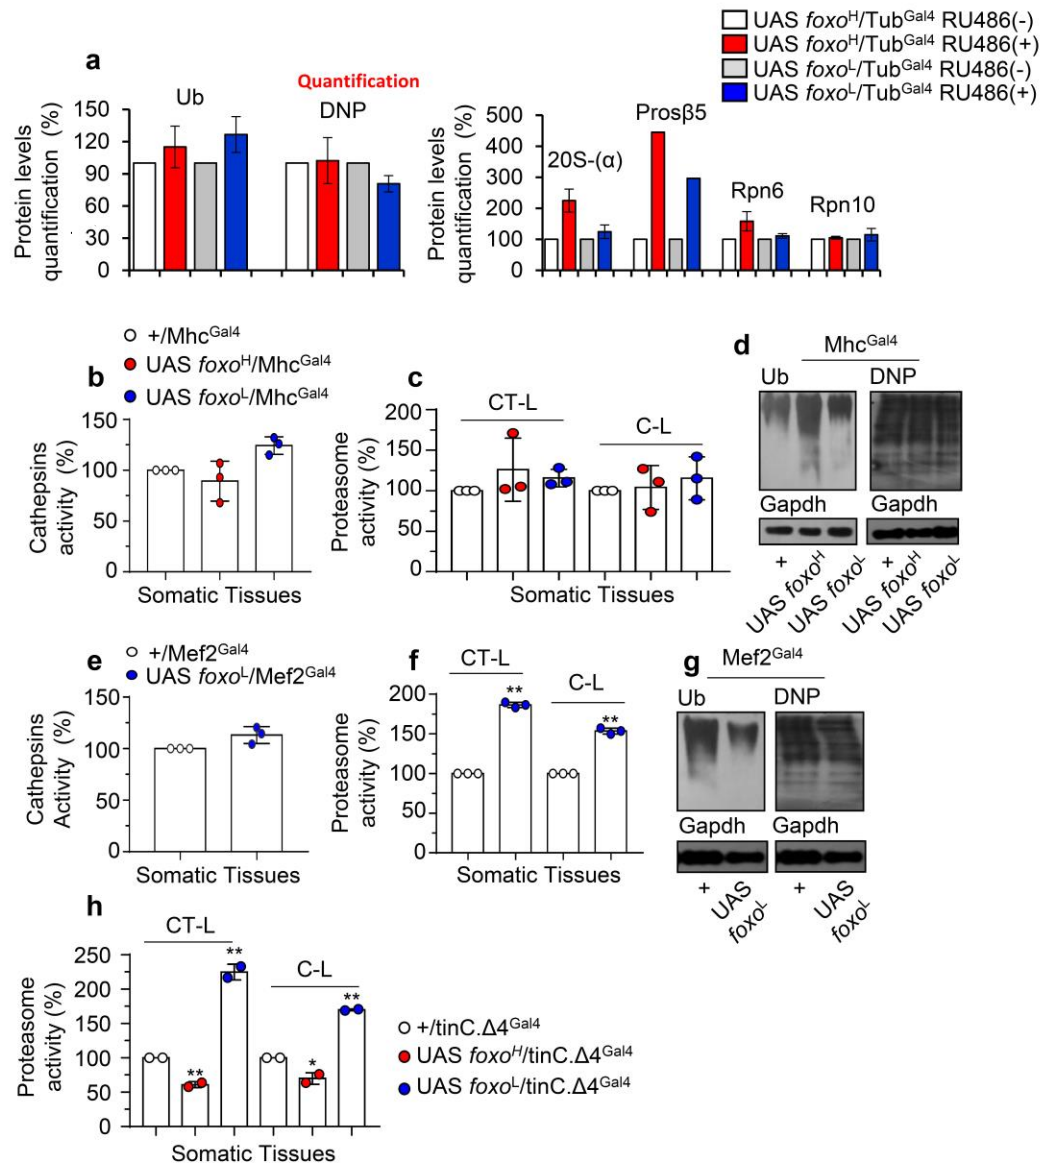

**Figure S6.** Dose-dependent activation of proteostatic modules after tissue-specific *foxo* OE in *Drosophila* flies. (a) Relative (%) vs. respective control quantification of immunoblots shown at Figure 6f. (b) Cathepsins activity (%), (c) 26S CT-L and C-L proteasome activity (%) (bars are as in b), and (d) immunoblots of total ubiquitinated (Ub) and carbonylated (DNP) protein levels in somatic tissues' lysates of young *Drosophila* flies after moderate muscle-specific (Mhc<sup>Gal4</sup>) induction of *foxo*<sup>H</sup> or *foxo*<sup>L</sup> transgenes. (e) Cathepsins activity (%), (f) 26S CT-L and C-L proteasome activity (%) (bars are as in e) and, (g) immunoblots of total ubiquitinated (Ub) and carbonylated (DNP) protein levels in somatic tissues' lysates of young *Drosophila* flies after strong muscle-specific (Mef2<sup>Gal4</sup>) induction of *foxo*<sup>L</sup>. (h) 26S CT-L and C-L proteasome activity (%) in somatic tissues' lysates of *Drosophila* flies following heart-specific (tinC.Δ4<sup>Gal4</sup>) OE of *foxo*<sup>H</sup> or *foxo*<sup>L</sup> transgenes. In (a-c, e, f, h) control values were set to 100%. In (a, d, g) Gapdh was used as a loading control. Bars, ± SD; n ≥ 2, 10 flies were analyzed per experimental repeat. In (a), statistical significance was measured with unpaired *t*-test. In (b, c, e, f, h) significant differences were calculated with a two-way ANOVA test followed by Tukey's multiple comparisons test, \* *p* < 0.05, \*\* *p* < 0.01.

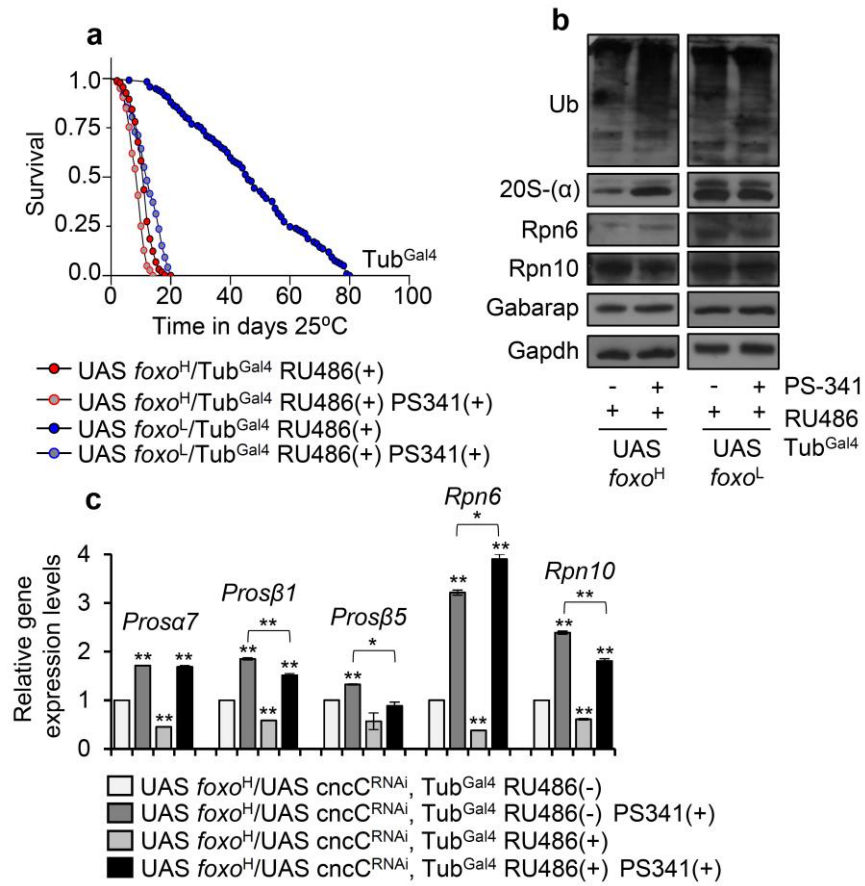

**Figure S7.** *Nrf2/cncC*- and downstream proteasome-activation after sustained *foxo* OE is vital for transgenic flies' survival. **(a)** Longevity curves of *foxo* overexpressing transgenic flies cultured (or not) with the proteasome inhibitor PS341 (5 μM) for 3 days. Longevity statistics are reported in Table S1. **(b)** Immunoblots of somatic tissues' protein lysates isolated from *foxo* overexpressing flies exposed (or not) to 5 μM PS341 for 3 days; antibodies used were against total ubiquitinated (Ub) proteins, proteasome [20S-(α), Rpn6, Rpn10] subunits and the autophagy-related Gabarap protein. Gapdh was used as loading control. **(c)** Relative expression levels of proteasome (*Prosa7*, *Prosβ1*, *Prosβ5*, *Rpn6*, *Rpn10*) genes. Gene expression was plotted vs. shown controls set to 1. The *RpL32* gene expression was used as input reference. Bars, ± SD; n ≥ 2, > 10 flies were analyzed per experimental repeat. Statistical significance was calculated with unpaired t-test, \* *p* < 0.05, \*\* *p* < 0.01.



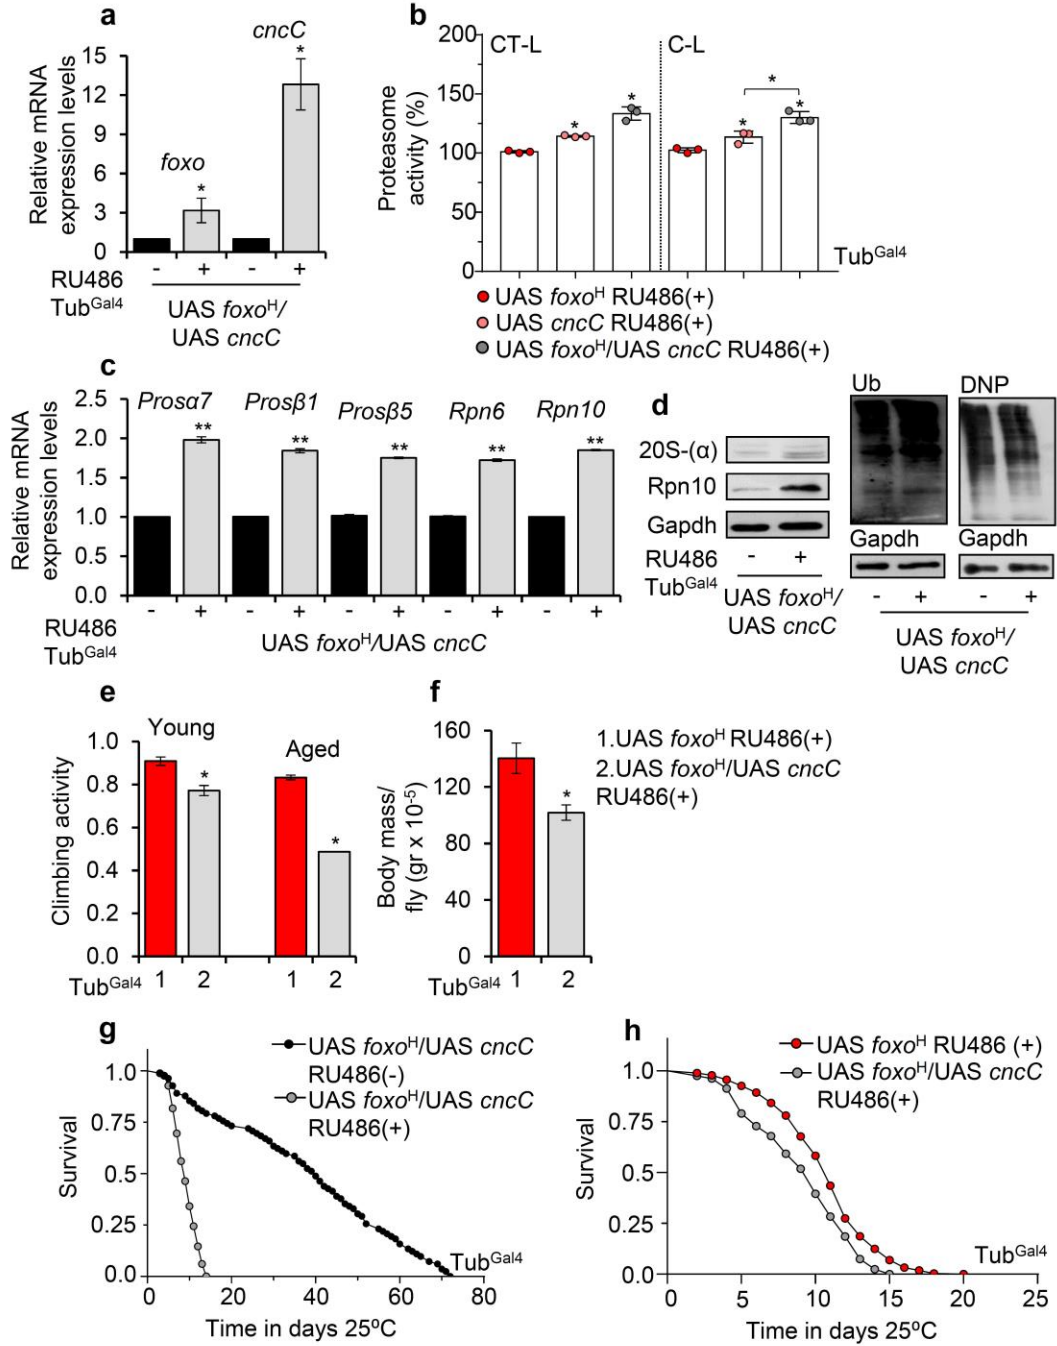

**Figure S8.** Combined *foxo* and *Nrf2/cncC* OE enhances proteasome activity; yet in the long term it is toxic. (a) Relative expression levels of *foxo* and *Nrf2/cncC* genes in *foxo<sup>H</sup>/cncC* *Drosophila* transgenic flies. (b) 26S CT-L and C-L proteasome activity (%) in somatic tissues of the shown transgenic lines; control values were set to 100%. (c) Relative expression levels of proteasome (*Prosa7*, *Prosβ1*, *Prosβ5*, *Rpn6*, *Rpn10*) genes in *foxo<sup>H</sup>/cncC* flies vs. controls. (d) Immunoblotting analysis in protein lysates isolated from *foxo<sup>H</sup>/cncC* flies' somatic tissues using antibodies against proteasomal subunits [20S-(α) and Rpn10], and total ubiquitinated (Ub) or carbonylated (DNP) proteins. Gapdh was used as a loading control. (e) Neuromuscular degeneration (climbing activity) during aging in shown transgenic flies. (f) Body mass per fly (gr × 10<sup>-5</sup>) of *foxo<sup>H</sup>/cncC* vs. *foxo<sup>H</sup>* overexpressing transgenic flies. (g) Longevity curves of *foxo<sup>H</sup>/cncC* flies vs. non-induced controls [RU486(-)] or (h) as compared to *foxo<sup>H</sup>* flies. Statistics of longevity assays are reported in Table S1. In (a-d, f) experiments were performed in young flies 7

days post the transgenes' induction. In (a, c) gene expression was plotted *vs.* controls set to 1; the *RpL32* gene expression was used as input reference. Bars,  $\pm$  SD;  $n \geq 2$ ,  $> 10$  flies were analyzed per experimental repeat. In (a, c, e, f) statistical significance was calculated using the unpaired t-test, \*  $p < 0.05$ , \*\*  $p < 0.01$ . In (b), a two-way ANOVA test followed by Tukey's multiple comparisons test was performed to determine statistical significance, \*  $p < 0.05$ .

## List of genes

*Akt1* (Akt kinase, FBgn0010379, CG4006); *Atg8a* (autophagy-related 8a, FBgn0052672, CG32672); *blw* (bellwether, also known as *ATP5A* or *ATPsyn- $\alpha$* , FBgn0011211, CG6312); *bmm* (also known as *ATGL*, brummer lipase, FBgn0036449, CG5295); *cncC* (cap-n-collar isoform-C, FBgn0262975, CG43286); *Drp1* (dynamin related protein 1, FBgn0026479, CG3210); *foxo* (forkhead box, subgroup O, FBgn0038197, CG3143); *G6P* (glucose-6-phosphatase, FBgn0031463, CG15400); *GlyP* (glycogen phosphorylase, FBgn0004507, CG7254); *GlyS* (glycogen synthase, FBgn0266064, CG6904); *HDAC6* (histone deacetylase 6, FBgn0026428, CG6170); *Ilp2* (insulin-like peptide 2, FBgn0036046, CG8167); *Ilp6* (insulin-like peptide 6, FBgn0044047, CG14049); *Impl2* (ecdysone-inducible gene L2, FBgn001257, CG15009); *InR* (insulin-like receptor, FBgn0283499, CG18402); *Marf* (mitochondrial assembly regulatory factor, FBgn0029870, CG3869); *srl* (also known as *PGC-1*, spargel, FBgn0037248, CG9809); *Prosa7* (proteasome  $\alpha 7$  subunit, FBgn0023175, CG1519); *Prosb1* (proteasome  $\beta 1$  subunit, FBgn0010590, CG8392); *Prosb5* (Proteasome  $\beta 5$  subunit, FBgn0029134, CG12323); *ref(2)P* (p62, refractory to sigma P, FBgn0003231, CG10360); *RpL32* (also known as *Rp49*, ribosomal protein L32, FBgn0002626, CG7939); *Rpn10* (regulatory particle non-ATPase 10, FBgn0015283, CG7619); *Rpn6* (regulatory particle non-ATPase 6, FBgn0028689, CG10149); *TFAM* (mitochondrial transcription factor A, FBgn0038805, CG4217).

## List of abbreviations

Autophagy-lysosome pathway, ALP; cap'n'collar isoform C, *cncC*; caspase-like activity, C-L; chymotrypsin-like activity, CT-L; forkhead box O, FoxO; insulin/insulin-like growth factor signaling, IIS; nuclear factor erythroid 2 like 2, Nrf2; overexpression, OE; proteostasis network, PN; ubiquitin-proteasome pathway, UPP.

## Graphical Abstract

*foxo* transcription factor acts as a cellular stress sensor and is a downstream target of the IIS. Upon fasting, *foxo* translocates to the nucleus, where it activates the transcription of (direct or indirect) longevity-associated gene expression programs. In this study, we induced ubiquitous, or tissue targeted OE of *foxo* in *Drosophila*'s somatic or muscle-, heart-tissues, respectively. We used two transgenic lines that express distinct levels of *foxo* [i.e., high (*foxo<sup>H</sup>*) or low (*foxo<sup>L</sup>*) *foxo* expression levels]. Our data suggest that high, ubiquitous *foxo* OE deregulates proteostatic pathways and alters major metabolic signaling cascades, increasing sensitivity to stress, and ultimately leading to premature aging. Notably, there is a defined dosage of low tissue-specific *foxo* OE that promotes tissue integrity and overall homeostasis resulting in enhanced health-/life-span.
