# Supplementary material for: Differential Dose- and Tissue-Dependent Effects of foxo on Aging, Metabolic and Proteostatic Pathways
Source: MDPI journal article supplement (doi:10.3390/cells10123577), 2021-12-18
Supplement: s1 [file s1]

Table S1. Summary of lifespan experiments and longevity statistics.

| Fig. 2a | Sample                                              | Mean Lifespan (LF) +/- s.e.m. (Days) |      | Median Lifespan +/- s.e.m. (Days) |      | % Median LF vs. control | Max (Days) | Log Rank Value                                      |                                                     |                                                     |                                                     | Total Animals Died/Total |
|---------|-----------------------------------------------------|--------------------------------------|------|-----------------------------------|------|-------------------------|------------|-----------------------------------------------------|-----------------------------------------------------|-----------------------------------------------------|-----------------------------------------------------|--------------------------|
|         |                                                     |                                      |      |                                   |      |                         |            | UAS foxo <sup>H</sup> /Tub <sup>Gal4</sup> RU486(-) | UAS foxo <sup>H</sup> /Tub <sup>Gal4</sup> RU486(+) | UAS foxo <sup>L</sup> /Tub <sup>Gal4</sup> RU486(-) | UAS foxo <sup>L</sup> /Tub <sup>Gal4</sup> RU486(+) |                          |
|         | UAS foxo <sup>H</sup> /Tub <sup>Gal4</sup> RU486(-) | 52.50                                | 1.64 | 58.00                             | 1.40 | 100.00                  | 78.00      |                                                     | 0.00                                                | 0.00                                                | 0.53                                                | 110/110                  |
|         | UAS foxo <sup>H</sup> /Tub <sup>Gal4</sup> RU486(+) | 10.70                                | 0.20 | 11.00                             | 0.21 | 18.97                   | 20.00      | 0.00                                                |                                                     | 0.00                                                | 0.00                                                | 273/273                  |
|         | UAS foxo <sup>L</sup> /Tub <sup>Gal4</sup> RU486(-) | 66.90                                | 2.28 | 68.00                             | 3.16 | 117.24                  | 86.00      | 0.00                                                | 0.00                                                |                                                     | 0.00                                                | 40/40                    |
|         | UAS foxo <sup>L</sup> /Tub <sup>Gal4</sup> RU486(+) | 46.20                                | 1.82 | 46.00                             | 1.93 | 79.31                   | 80.00      | 0.53                                                | 0.00                                                | 0.00                                                |                                                     | 117/117                  |

| Fig. 3d | Sample                                                    | Mean Lifespan (LF) +/- s.e.m. (Days) |      | Median Lifespan +/- s.e.m. (Days) |      | % Median LF vs. control | Max (Days) | Log Rank Value                                      |                                                           |                                                     |  | Total Animals Died/Total |
|---------|-----------------------------------------------------------|--------------------------------------|------|-----------------------------------|------|-------------------------|------------|-----------------------------------------------------|-----------------------------------------------------------|-----------------------------------------------------|--|--------------------------|
|         |                                                           |                                      |      |                                   |      |                         |            | UAS foxo <sup>H</sup> /Tub <sup>Gal4</sup> RU486(+) | UAS foxo <sup>H</sup> /Tub <sup>Gal4</sup> RU486(+)<br>PR | UAS foxo <sup>H</sup> /Tub <sup>Gal4</sup> RU486(+) |  |                          |
|         | UAS foxo <sup>H</sup> /Tub <sup>Gal4</sup> RU486(+)       | 10.70                                | 0.20 | 11.00                             | 0.21 | 100.00                  | 20.00      |                                                     | 0.18                                                      | 0.00                                                |  | 273/273                  |
|         | UAS foxo <sup>H</sup> /Tub <sup>Gal4</sup> RU486(+)<br>PR | 10.49                                | 0.22 | 10.00                             | 0.35 | 90.91                   | 16.00      | 0.18                                                |                                                           | 0.00                                                |  | 193/193                  |
|         | UAS foxo <sup>H</sup> /Tub <sup>Gal4</sup> RU486(+)<br>CR | 6.80                                 | 0.24 | 7.00                              | 0.34 | 63.64                   | 12.00      | 0.00                                                | 0.00                                                      |                                                     |  | 118/118                  |

| Fig. 3e | Sample                                                    | Mean Lifespan (LF) +/- s.e.m. (Days) |      | Median Lifespan +/- s.e.m. (Days) |      | % Median LF vs. control | Max (Days) | Log Rank Value                                      |                                                           |                                                     |  | Total Animals Died/Total |
|---------|-----------------------------------------------------------|--------------------------------------|------|-----------------------------------|------|-------------------------|------------|-----------------------------------------------------|-----------------------------------------------------------|-----------------------------------------------------|--|--------------------------|
|         |                                                           |                                      |      |                                   |      |                         |            | UAS foxo <sup>L</sup> /Tub <sup>Gal4</sup> RU486(+) | UAS foxo <sup>L</sup> /Tub <sup>Gal4</sup> RU486(+)<br>PR | UAS foxo <sup>L</sup> /Tub <sup>Gal4</sup> RU486(+) |  |                          |
|         | UAS foxo <sup>L</sup> /Tub <sup>Gal4</sup> RU486(+)       | 46.20                                | 1.82 | 46.00                             | 1.93 | 100.00                  | 80.00      |                                                     | 0.73                                                      | 0.00                                                |  | 117/117                  |
|         | UAS foxo <sup>L</sup> /Tub <sup>Gal4</sup> RU486(+)<br>PR | 49.18                                | 1.48 | 50.00                             | 2.28 | 108.70                  | 78.00      | 0.73                                                |                                                           | 0.00                                                |  | 120/120                  |
|         | UAS foxo <sup>L</sup> /Tub <sup>Gal4</sup> RU486(+)<br>CR | 25.13                                | 0.84 | 26.00                             | 1.17 | 56.52                   | 42.00      | 0.00                                                | 0.00                                                      |                                                     |  | 120/120                  |

| Fig. 3f | Sample                                                    | Mean Lifespan (LF) +/- s.e.m. (Days) |      | Median Lifespan +/- s.e.m. (Days) |      | % Median LF vs. control | Max (Days) | Log Rank Value                                      |                                                           |                                                     |                                                           | Total Animals Died/Total |
|---------|-----------------------------------------------------------|--------------------------------------|------|-----------------------------------|------|-------------------------|------------|-----------------------------------------------------|-----------------------------------------------------------|-----------------------------------------------------|-----------------------------------------------------------|--------------------------|
|         |                                                           |                                      |      |                                   |      |                         |            | UAS foxo <sup>H</sup> /Tub <sup>Gal4</sup> RU486(+) | UAS foxo <sup>H</sup> /Tub <sup>Gal4</sup> RU486(+)<br>SS | UAS foxo <sup>L</sup> /Tub <sup>Gal4</sup> RU486(+) | UAS foxo <sup>L</sup> /Tub <sup>Gal4</sup> RU486(+)<br>SS |                          |
|         | UAS foxo <sup>H</sup> /Tub <sup>Gal4</sup> RU486(+)       | 10.77                                | 0.20 | 11.00                             | 0.21 | 100.00                  | 20.00      |                                                     | 0.86                                                      | 0.00                                                | 0.00                                                      | 273/273                  |
|         | UAS foxo <sup>H</sup> /Tub <sup>Gal4</sup> RU486(+)<br>SS | 10.26                                | 0.38 | 11.00                             | 0.96 | 100.00                  | 16.00      | 0.86                                                |                                                           | 0.00                                                | 0.00                                                      | 105/105                  |
|         | UAS foxo <sup>L</sup> /Tub <sup>Gal4</sup> RU486(+)       | 46.23                                | 1.82 | 46.00                             | 1.93 | 418.18                  | 80.00      | 0.00                                                | 0.00                                                      |                                                     | 0.00                                                      | 117/117                  |
|         | UAS foxo <sup>L</sup> /Tub <sup>Gal4</sup> RU486(+)<br>SS | 54.43                                | 1.59 | 54.00                             | 1.83 | 490.91                  | 85.00      | 0.00                                                | 0.00                                                      | 0.00                                                |                                                           | 120/120                  |

| Fig. 4b | Sample                                      | Mean Lifespan (LF) +/- s.e.m. (Days) |       | Median Lifespan +/- s.e.m. (Days) |       | % Median LF vs. control | Max (Days) | Log Rank P Value |                                             |                                             |  | Total Animals Died/Total |
|---------|---------------------------------------------|--------------------------------------|-------|-----------------------------------|-------|-------------------------|------------|------------------|---------------------------------------------|---------------------------------------------|--|--------------------------|
|         |                                             |                                      |       |                                   |       |                         |            | +MhcGal4         | UAS foxo <sup>H</sup> / Mhc <sup>Gal4</sup> | UAS foxo <sup>L</sup> / Mhc <sup>Gal4</sup> |  |                          |
|         | +MhcGal4                                    | 58.738                               | 0.943 | 58.000                            | 1.080 | 100.00                  | 8.00       |                  | 0.00                                        |                                             |  | 229/229                  |
|         | UAS foxo <sup>H</sup> / Mhc <sup>Gal4</sup> | 49.695                               | 0.997 | 48.000                            | 1.449 | 82.76                   | 91.00      | 0.00             |                                             | 0.00                                        |  | 210/210                  |
|         | UAS foxo <sup>L</sup> / Mhc <sup>Gal4</sup> | 65.995                               | 1.329 | 66.000                            | 2.079 | 113.79                  | 102.00     | 0.00             | 0.00                                        |                                             |  | 197/197                  |

| Fig. 4f | Sample                                       | Mean Lifespan (LF) +/- s.e.m. (Days) |      | Median Lifespan +/- s.e.m. (Days) |      | % Median LF vs. control | Max (Days) | Log Rank P Value |                                              |  |  | Total Animals Died/Total |
|---------|----------------------------------------------|--------------------------------------|------|-----------------------------------|------|-------------------------|------------|------------------|----------------------------------------------|--|--|--------------------------|
|         |                                              |                                      |      |                                   |      |                         |            | +Mef2Gal4        | UAS foxo <sup>L</sup> / Mef2 <sup>Gal4</sup> |  |  |                          |
|         | +Mef2Gal4                                    | 57.48                                | 1.11 | 59.00                             | 1.62 | 100.00                  | 80.00      |                  | 0.00                                         |  |  | 197/197                  |
|         | UAS foxo <sup>L</sup> / Mef2 <sup>Gal4</sup> | 70.58                                | 1.58 | 74.00                             | 2.52 | 125.42                  | 102.00     | 0.00             |                                              |  |  | 175/175                  |

| Fig. 5c | Sample                                         | Mean Lifespan (LF) +/- s.e.m. (Days) |       | Median Lifespan +/- s.e.m. (Days) |       | % Median LF vs. control | Max (Days) | Log Rank P Value         |                                                |                                                |  | Total Animals Died/Total |
|---------|------------------------------------------------|--------------------------------------|-------|-----------------------------------|-------|-------------------------|------------|--------------------------|------------------------------------------------|------------------------------------------------|--|--------------------------|
|         |                                                |                                      |       |                                   |       |                         |            | +tinC.Δ4 <sup>Gal4</sup> | UAS foxo <sup>H</sup> /tinC.Δ4 <sup>Gal4</sup> | UAS foxo <sup>L</sup> /tinC.Δ4 <sup>Gal4</sup> |  |                          |
|         | +tinC.Δ4 <sup>Gal4</sup>                       | 53.978                               | 1.534 | 52.000                            | 2.098 | 100.00                  | 81.00      |                          | 0.00                                           | 0.00                                           |  | 138/138                  |
|         | UAS foxo <sup>H</sup> /tinC.Δ4 <sup>Gal4</sup> | 22.710                               | 1.736 | 19.000                            | 4.000 | 36.54                   | 58.00      | 0.00                     |                                                | 0.00                                           |  | 100/100                  |
|         | UAS foxo <sup>L</sup> /tinC.Δ4 <sup>Gal4</sup> | 56.156                               | 2.108 | 60.000                            | 2.274 | 115.38                  | 85.00      | 0.00                     | 0.00                                           |                                                |  | 122/122                  |

| Fig. 7g | Sample                                                                        | Mean Lifespan (LF) +/- s.e.m. (Days) |       | Median Lifespan +/- s.e.m. (Days) |       | % Median LF vs. control | Max (Days) | Log Rank P Value                                                              |                                                                               |  |  | Total Animals Died/Total |
|---------|-------------------------------------------------------------------------------|--------------------------------------|-------|-----------------------------------|-------|-------------------------|------------|-------------------------------------------------------------------------------|-------------------------------------------------------------------------------|--|--|--------------------------|
|         |                                                                               |                                      |       |                                   |       |                         |            | UAS foxo <sup>H</sup> /UAS cncC <sup>RNAi</sup> /Tub <sup>Gal4</sup> RU486(-) | UAS foxo <sup>H</sup> /UAS cncC <sup>RNAi</sup> /Tub <sup>Gal4</sup> RU486(+) |  |  |                          |
|         | UAS foxo <sup>H</sup> /UAS cncC <sup>RNAi</sup> /Tub <sup>Gal4</sup> RU486(-) | 36.200                               | 2.561 | 53.000                            | 2.981 | 100                     | 79         |                                                                               | 0.00                                                                          |  |  | 120/120                  |
|         | UAS foxo <sup>H</sup> /UAS cncC <sup>RNAi</sup> /Tub <sup>Gal4</sup> RU486(+) | 20.067                               | 0.604 | 8.000                             | 0.381 | 15.09433962             | 16         | 0.00                                                                          |                                                                               |  |  | 128/130                  |

| Fig. 7h | Sample                                                                        | Mean Lifespan (LF) +/- s.e.m. (Days) |       | Median Lifespan +/- s.e.m. (Days) |       | % Median LF vs. control | Max (Days) | Log Rank Value                                       |                                                                               |  |  | Total Animals Died/Total |
|---------|-------------------------------------------------------------------------------|--------------------------------------|-------|-----------------------------------|-------|-------------------------|------------|------------------------------------------------------|-------------------------------------------------------------------------------|--|--|--------------------------|
|         |                                                                               |                                      |       |                                   |       |                         |            | UAS foxo <sup>H</sup> / Tub <sup>Gal4</sup> RU486(+) | UAS foxo <sup>H</sup> /UAS cncC <sup>RNAi</sup> /Tub <sup>Gal4</sup> RU486(+) |  |  |                          |
|         | UAS foxo <sup>H</sup> / Tub <sup>Gal4</sup> RU486(+)                          | 8.728                                | 0.210 | 11.000                            | 0.170 | 100                     | 20         |                                                      | 0.00                                                                          |  |  | 273/273                  |
|         | UAS foxo <sup>H</sup> /UAS cncC <sup>RNAi</sup> /Tub <sup>Gal4</sup> RU486(+) | 20.067                               | 0.604 | 8.000                             | 0.381 | 72.72727273             | 16         | 0.00                                                 |                                                                               |  |  | 128/130                  |

| Suppl. Fig. S7a | Sample                                                            | Mean Lifespan (LF) +/- s.e.m. (Days) |      | Median Lifespan +/- s.e.m. (Days) |        | % Median LF vs. control | Max (Days) | Log Rank Value                                      |                                                                   |                                                     |                                                                   | Total Animals Died/Total |
|-----------------|-------------------------------------------------------------------|--------------------------------------|------|-----------------------------------|--------|-------------------------|------------|-----------------------------------------------------|-------------------------------------------------------------------|-----------------------------------------------------|-------------------------------------------------------------------|--------------------------|
|                 |                                                                   |                                      |      |                                   |        |                         |            | UAS foxo <sup>H</sup> /Tub <sup>Gal4</sup> RU486(+) | UAS foxo <sup>H</sup> /Tub <sup>Gal4</sup> RU486(+)<br>PS341 5 μM | UAS foxo <sup>L</sup> /Tub <sup>Gal4</sup> RU486(+) | UAS foxo <sup>L</sup> /Tub <sup>Gal4</sup> RU486(+)<br>PS341 5 μM |                          |
|                 | UAS foxo <sup>H</sup> /Tub <sup>Gal4</sup> RU486(+)               | 10.77                                | 0.20 | 11.00                             | 0.21   | 100.00                  | 20.00      |                                                     | 0.00                                                              | 0.00                                                | 0.00                                                              | 273/273                  |
|                 | UAS foxo <sup>H</sup> /Tub <sup>Gal4</sup> RU486(+)<br>PS341 5 μM | 8.46                                 | 0.21 | 9.00                              | 0.35   | 81.82                   | 14.00      | 0.00                                                |                                                                   | 0.00                                                | 0.00                                                              | 179/179                  |
|                 | UAS foxo <sup>L</sup> /Tub <sup>Gal4</sup> RU486(+)               | 45.86                                | 1.86 | 46.00                             | 3.833  | 418.18                  | 80.00      | 0.00                                                | 0.00                                                              |                                                     | 0.00                                                              | 117/117                  |
|                 | UAS foxo <sup>L</sup> /Tub <sup>Gal4</sup> RU486(+)<br>PS341 5 μM | 11.56                                | 1.50 | 12.00                             | 0.2609 | 109.09                  | 20.00      | 0.00                                                | 0.00                                                              | 0.00                                                |                                                                   | 80/80                    |

| Suppl. Fig. S8g | Sample                                                       | Mean Lifespan (LF) +/- s.e.m. (Days) |       | Median Lifespan +/- s.e.m. (Days) |       | % Median LF vs. control | Max (Days) | Log Rank Value                                               |                                                              |  |  | Total Animals Died/Total |
|-----------------|--------------------------------------------------------------|--------------------------------------|-------|-----------------------------------|-------|-------------------------|------------|--------------------------------------------------------------|--------------------------------------------------------------|--|--|--------------------------|
|                 |                                                              |                                      |       |                                   |       |                         |            | UAS foxo <sup>H</sup> /UAS cncC/Tub <sup>Gal4</sup> RU486(-) | UAS foxo <sup>H</sup> /UAS cncC/Tub <sup>Gal4</sup> RU486(+) |  |  |                          |
|                 | UAS foxo <sup>H</sup> /UAS cncC/Tub <sup>Gal4</sup> RU486(-) | 42.999                               | 1.905 | 46.000                            | 1.747 | 100                     | 76         |                                                              | 0.00                                                         |  |  | 112/115                  |
|                 | UAS foxo <sup>H</sup> /UAS cncC/Tub <sup>Gal4</sup> RU486(+) | 9.742                                | 0.230 | 10.000                            | 0.313 | 21.73913043             | 17         | 0.00                                                         |                                                              |  |  | 159/159                  |

| Suppl. Fig. S8h | Sample                                                       | Mean Lifespan (LF) +/- s.e.m. (Days) |       | Median Lifespan +/- s.e.m. (Days) |       | % Median LF vs. control | Max (Days) | Log Rank Value                                       |                                                              |  |  | Total Animals Died/Total |
|-----------------|--------------------------------------------------------------|--------------------------------------|-------|-----------------------------------|-------|-------------------------|------------|------------------------------------------------------|--------------------------------------------------------------|--|--|--------------------------|
|                 |                                                              |                                      |       |                                   |       |                         |            | UAS foxo <sup>H</sup> / Tub <sup>Gal4</sup> RU486(+) | UAS foxo <sup>H</sup> /UAS cncC/Tub <sup>Gal4</sup> RU486(+) |  |  |                          |
|                 | UAS foxo <sup>H</sup> / Tub <sup>Gal4</sup> RU486(+)         | 11.132                               | 0.163 | 11.000                            | 0.170 | 100                     | 20         |                                                      | 0.00                                                         |  |  | 273/273                  |
|                 | UAS foxo <sup>H</sup> /UAS cncC/Tub <sup>Gal4</sup> RU486(+) | 9.742                                | 0.230 | 10.000                            | 0.313 | 90.90909091             | 17         | 0.00                                                 |                                                              |  |  | 159/159                  |
